# Supplementary figures and images for: Antifungal Activity and Alleviation of Salt Stress by Volatile Organic Compounds of Native Pseudomonas Obtained from Mentha piperita
Source: MDPI journal article supplement (doi:10.3390/plants12071488), 2023-03-29

a)

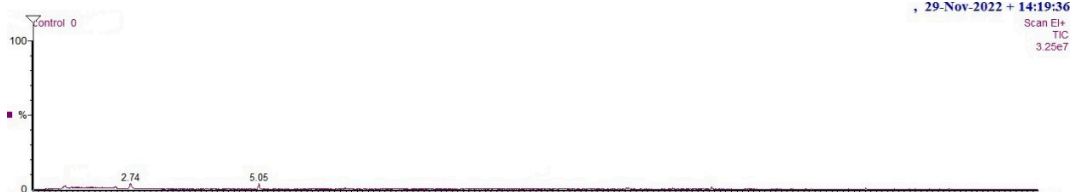

b)

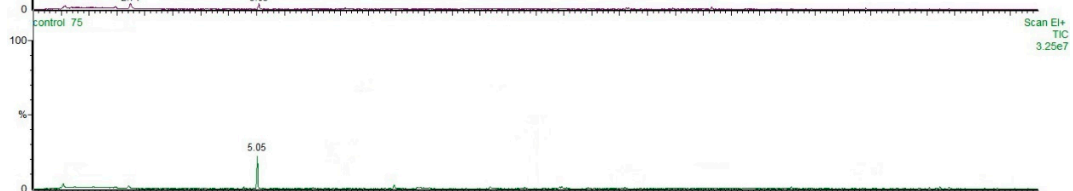

c)

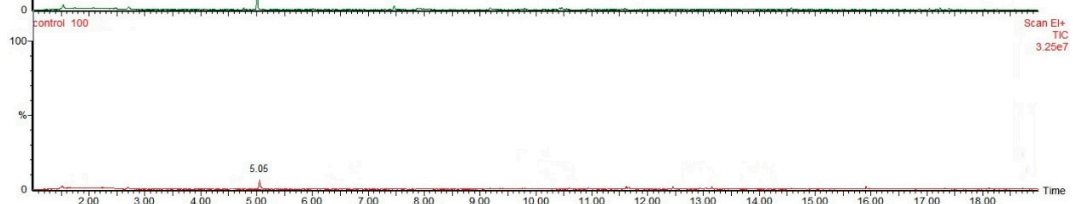

Supplement: s1 [file s1]

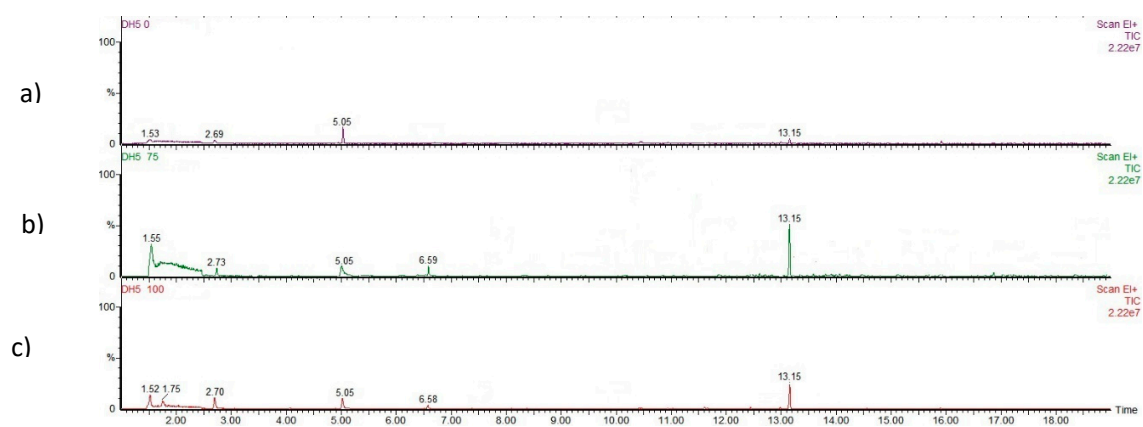

Supplement: s1 [file s1]

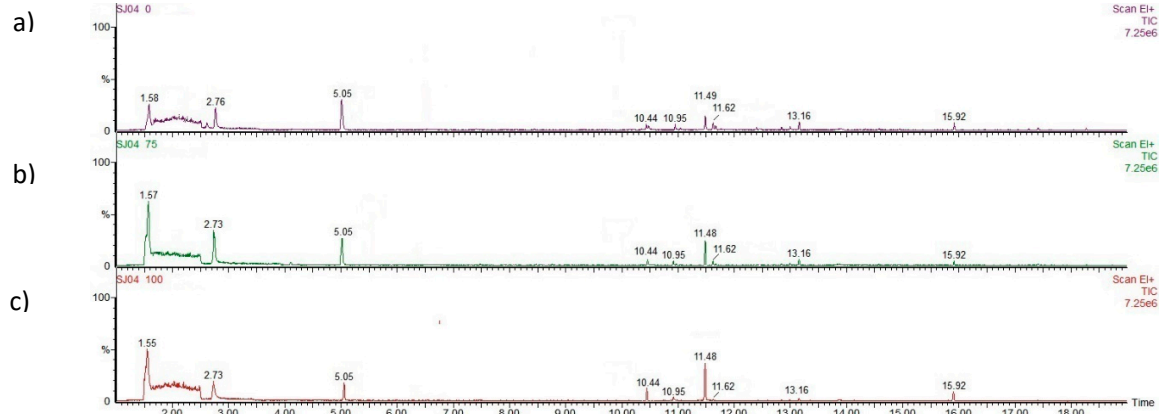

Supplement: s1 [file s1]

a)

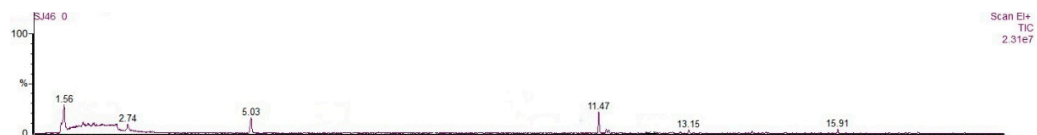

b)

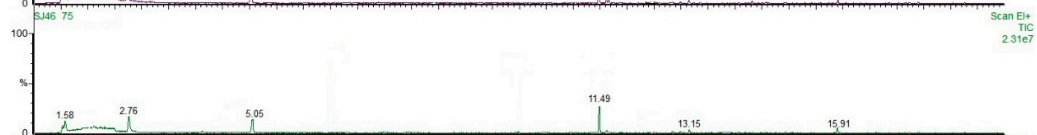

c)

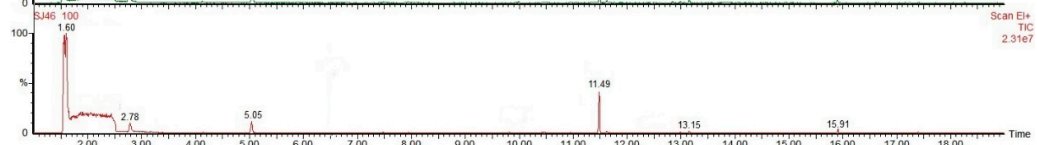

Supplement: s1 [file s1]
